# Supplementary material
Source: publisher site journal article supplement (https://www.degruyter.com/publication/journal_key/CHEM/downloadAsset/CHEM_CFP_2nd%20International%20Summit%20on%20Biopolymers%20and%20Polymer%20Science.pdf)
Supplement: Supplementary file 1 [file CHEM_CFP_2nd%20International%20Summit%20on%20Biopolymers%20and%20Polymer%20Science.pdf]

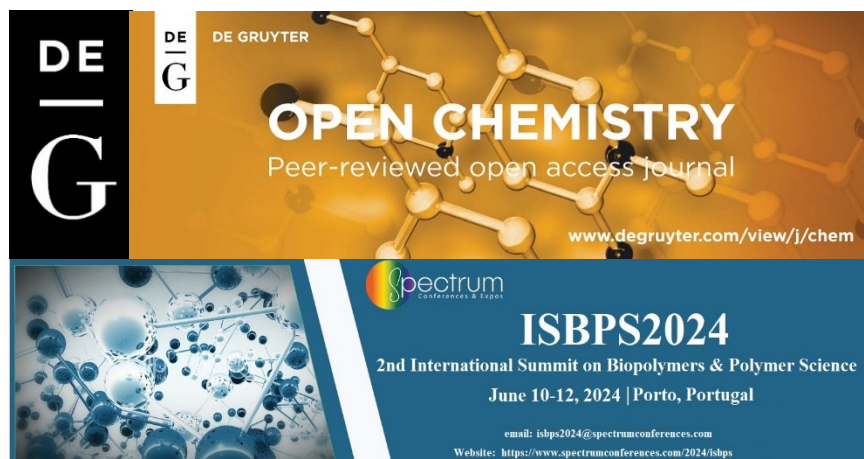

**DE GRUYTER**  
**2<sup>nd</sup> International Summit on Biopolymers and Polymer Science**  
**10-12 June, 2024, Porto, Portugal**

## DESCRIPTION

The event provides an opportunity to discuss the latest developments and cutting-edge technologies. The meeting brings together world-class participants and young researchers, and gives the opportunity to cross traditional disciplinary boundaries and solve multidisciplinary problems.

Topics include: Biopolymers, Biopolymers and bioplastics, Natural polymers, Advanced biopolymers, Bioplastics, Bioinformatics, Polymer chemistry, Biodegradable polymers, Bio renewable biopolymers, Polymer material science and engineering, Polymeric biomaterials, Polymer nanotechnology, Biopolymer applications Biopolymers as materials, Green composites in biopolymers, Biopolymers for tissue engineering and regenerative medicine, Biodegradable polymers polymers in biomedical applications, Recycling and waste management of biopolymers, Biopolymers in biofibers and microbial cellulose, Biopolymer feed stock challenges and opportunities, Biopolymers.

## HOW TO SUBMIT

The authors are kindly invited to register at our paper processing system and submit their contribution (both original papers or reviews are welcome). **We offer a discount to for attendees of the conference. All attendees of both conferences will receive 20 % discount for our Open Chemistry.** Please write about attending the conference in the cover letter. All manuscripts will undergo the standard peer-review process (single-blind, at least two independent reviewers) and will be treated in the same way as other regular articles (indexing, abstracting, immediate publication, etc.).

In case of any questions please contact Open Chemistry Managing Editor:  
Małgorzata Komadowska ([openchemistry@degruyter.com](mailto:openchemistry@degruyter.com)).

<https://www.degruyter.com/chem>  
<https://www.spectrumconferences.com/2024/isbps>
